# Supplementary material for: Increased fatty acid metabolism and decreased glycolysis are hallmarks of metabolic reprogramming within microglia in degenerating white matter during recovery from experimental stroke
Source: PubMed Central journal article supplement — J Cereb Blood Flow Metab. 2023 Feb 11;43(7):1099–114. doi: 10.1177/0271678X231157298 (PMC10291449; doi:10.1177/0271678x231157298), 2023-02-11
Supplement: sj-pdf-1-jcb-10.1177_0271678X231157298.pdf [file sj-pdf-1-jcb-10.1177_0271678X231157298.pdf]

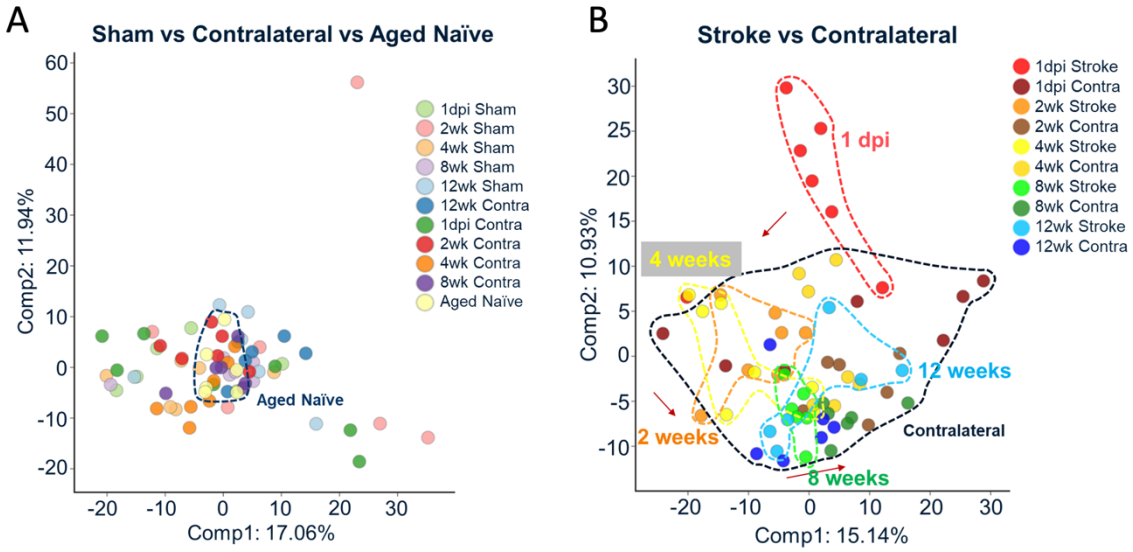

**Supplementary Figure 1. Principal component analysis of controls. A.** Despite some differences between the different control groups, sham mice and the contralateral hemispheres from the stroked mice still cluster close to the aged naïve controls. **B.** There is still separation based on stroke time point when using the contralateral hemispheres of the stroked mice as a control instead of the aged naïve mice used in **Figure 1D**.
