# Supplementary material for: Increased fatty acid metabolism and decreased glycolysis are hallmarks of metabolic reprogramming within microglia in degenerating white matter during recovery from experimental stroke
Source: PubMed Central journal article supplement — J Cereb Blood Flow Metab. 2023 Feb 11;43(7):1099–114. doi: 10.1177/0271678X231157298 (PMC10291449; doi:10.1177/0271678x231157298), 2023-02-11
Supplement: sj-pdf-2-jcb-10.1177_0271678X231157298.pdf [file sj-pdf-2-jcb-10.1177_0271678X231157298.pdf]

**Supplementary Table 1. Number of significantly differed metabolites in each of the comparisons.** Blue indicates the number of metabolites increased, and red indicates the number of metabolites decreased in the condition above the line.

| Welch's Two-sample t-test   | <i>Aged Naive</i><br><i>Young Naive</i>     | <i>1 dpi Stroke</i><br><i>Aged Naive</i>         | <i>1 dpi Stroke</i><br><i>1 dpi Contra</i>     | <i>1 dpi Stroke</i><br><i>1 dpi Sham</i>    | <i>1 dpi Contra</i><br><i>Aged Naive</i>  | <i>1 dpi Sham</i><br><i>Aged Naive</i>         | <i>1 dpi Contra</i><br><i>1 dpi Sham</i> |
|-----------------------------|---------------------------------------------|--------------------------------------------------|------------------------------------------------|---------------------------------------------|-------------------------------------------|------------------------------------------------|------------------------------------------|
| Total biochemicals p ≤ 0.05 | 190                                         | 202                                              | 153                                            | 167                                         | 50                                        | 85                                             | 50                                       |
| Biochemicals<br>↑↓          | 77 113                                      | 150 52                                           | 110 43                                         | 111 56                                      | 31 19                                     | 51 34                                          | 28 22                                    |
| Welch's Two-sample t-test   | <i>2 weeks Stroke</i><br><i>Aged Naive</i>  | <i>2 weeks Stroke</i><br><i>2 weeks Contra</i>   | <i>2 weeks Stroke</i><br><i>2 weeks Sham</i>   | <i>2 weeks Contra</i><br><i>Aged Naive</i>  | <i>2 weeks Sham</i><br><i>Aged Naive</i>  | <i>2 weeks Contra</i><br><i>2 weeks Sham</i>   |                                          |
| Total biochemicals p ≤ 0.05 | 242                                         | 170                                              | 124                                            | 96                                          | 43                                        | 61                                             |                                          |
| Biochemicals<br>↑↓          | 206 36                                      | 148 22                                           | 105 19                                         | 64 32                                       | 20 23                                     | 36 25                                          |                                          |
| Welch's Two-sample t-test   | <i>4 weeks Stroke</i><br><i>Aged Naive</i>  | <i>4 weeks Stroke</i><br><i>4 weeks Contra</i>   | <i>4 weeks Stroke</i><br><i>4 weeks Sham</i>   | <i>4 weeks Contra</i><br><i>Aged Naive</i>  | <i>4 weeks Sham</i><br><i>Aged Naive</i>  | <i>4 weeks Contra</i><br><i>4 weeks Sham</i>   |                                          |
| Total biochemicals p ≤ 0.05 | 244                                         | 183                                              | 201                                            | 89                                          | 54                                        | 53                                             |                                          |
| Biochemicals<br>↑↓          | 191 53                                      | 142 41                                           | 179 22                                         | 63 26                                       | 21 33                                     | 47 6                                           |                                          |
| Welch's Two-sample t-test   | <i>8 weeks Stroke</i><br><i>Aged Naive</i>  | <i>8 weeks Stroke</i><br><i>8 weeks Contra</i>   | <i>8 weeks Stroke</i><br><i>8 weeks Sham</i>   | <i>8 weeks Contra</i><br><i>Aged Naive</i>  | <i>8 weeks Sham</i><br><i>Aged Naive</i>  | <i>8 weeks Contra</i><br><i>8 weeks Sham</i>   |                                          |
| Total biochemicals p ≤ 0.05 | 188                                         | 134                                              | 148                                            | 77                                          | 94                                        | 70                                             |                                          |
| Biochemicals<br>↑↓          | 112 76                                      | 82 52                                            | 91 57                                          | 38 39                                       | 32 62                                     | 41 29                                          |                                          |
| Welch's Two-sample t-test   | <i>12 weeks Stroke</i><br><i>Aged Naive</i> | <i>12 weeks Stroke</i><br><i>12 weeks Contra</i> | <i>12 weeks Stroke</i><br><i>12 weeks Sham</i> | <i>12 weeks Contra</i><br><i>Aged Naive</i> | <i>12 weeks Sham</i><br><i>Aged Naive</i> | <i>12 weeks Contra</i><br><i>12 weeks Sham</i> |                                          |
| Total biochemicals p ≤ 0.05 | 121                                         | 127                                              | 51                                             | 97                                          | 67                                        | 53                                             |                                          |
| Biochemicals<br>↑↓          | 76 45                                       | 45 82                                            | 26 25                                          | 75 22                                       | 33 34                                     | 43 10                                          |                                          |
